# Supplementary material for: PathExt: a general framework for path-based mining of omics-integrated biological networks
Source: Oxford University Press journal article supplement (doi:10.1093/bioinformatics/btaa941), 2020-10-27
Supplement: btaa941_supplementary_data.zip [file btaa941_supplementary_data.zip]

Archive with 10 entries (10 files):
- BIOINF-2020-0247_PathExt.zip
- Supplementary_Figures_and_Supplementary_Info_S1.pdf
- Supplementary_File_S1.zip
- Supplementary_File_S2.zip
- Supplementary_File_S3.zip
- Supplementary_File_S4.zip
- Supplementary_File_S5.zip
- Supplementary_File_S6.zip
- Supplementary_Tables_S1_to_S5.xlsx
- Supplementary_Tables_S6_to_S13.xlsx
